# Supplementary material for: Structural characterization of the principal mRNA-export factor Mex67–Mtr2 from Chaetomium thermophilum
Source: PubMed Central journal article supplement (PMC4498709; doi:10.1107/s2053230x15008766), 2015-06-27
Supplement: f-71-00876-sup1.pdf [file f-71-00876-sup1.pdf]

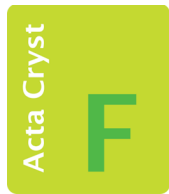

STRUCTURAL BIOLOGY  
COMMUNICATIONS

**Volume 71 (2015)**

**Supporting information for article:**

**Structural characterization of the principal mRNA export factor Mex67–Mtr2 from *Chaetomium thermophilum***

**Shintaro Aibara, Eugene Valkov, Meindert H. Lamers, Lyudmila Dimitrova, Ed Hurt and Murray Stewart**

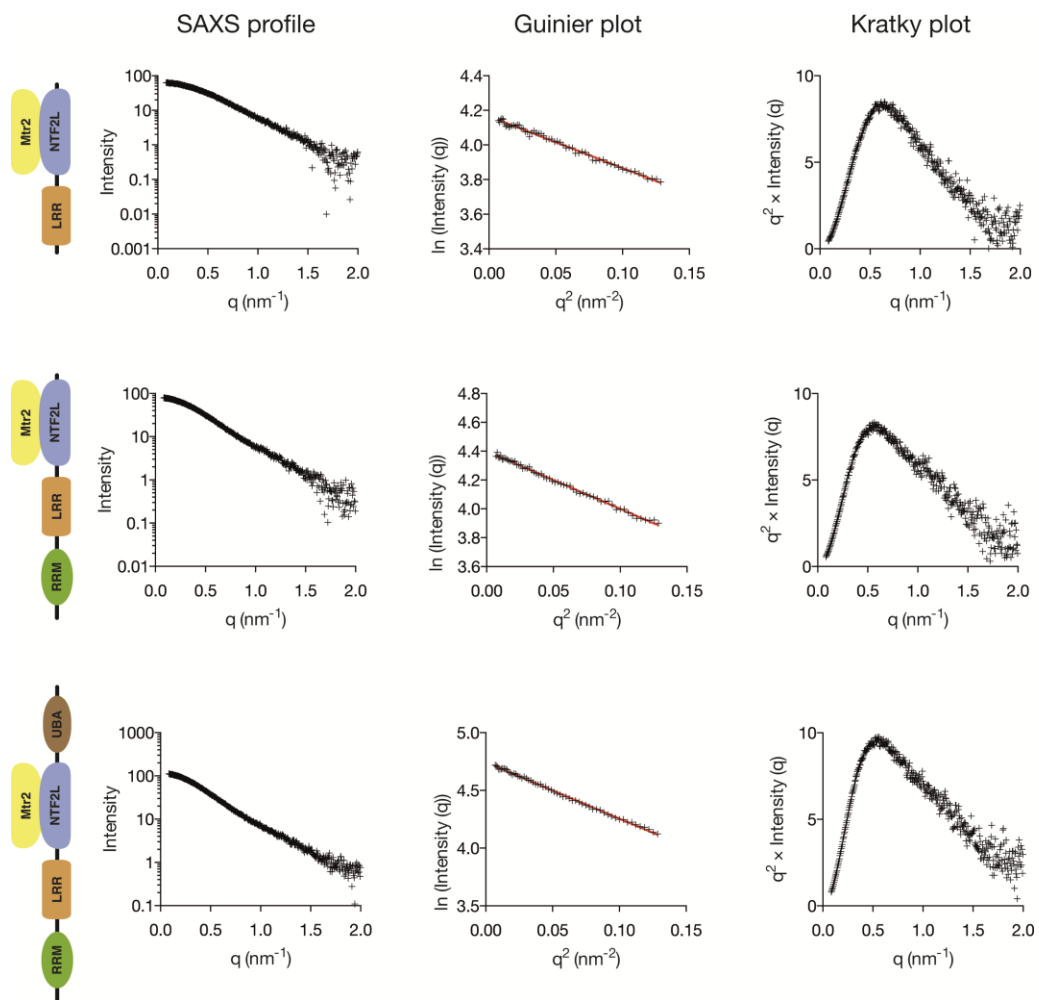

**Figure S1** (From left to right) The measured experimental SAXS profile, Guinier plot, and the Kratky plot for (from top to bottom): *ctMex67<sup>LRR</sup>-NTF2L*:Mtr2, *ctMex67<sup>ΔUBA</sup>*:Mtr2, and *ctMex67<sup>ΔN</sup>*:Mtr2. Highly schematic representations of the construct used are shown on the left side.

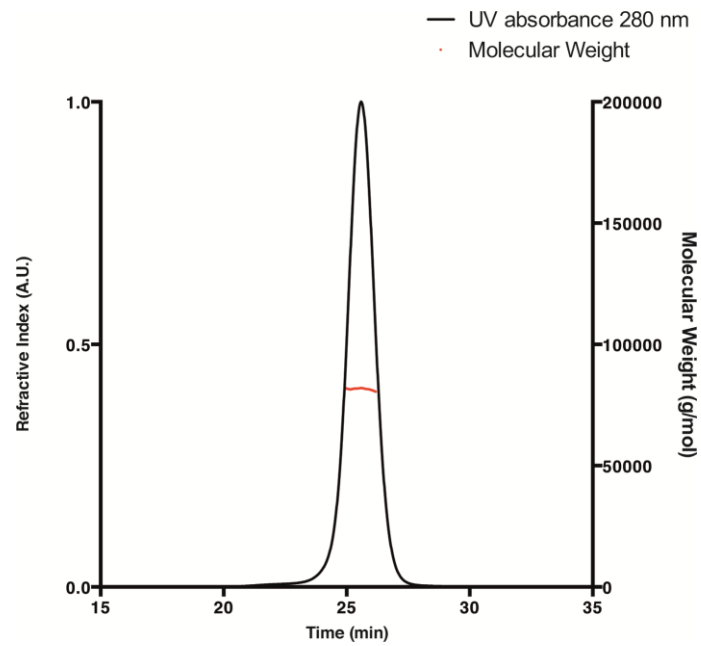

**Figure S2** *ctMex67*<sup>LRR-NTF2L</sup> was separated by size-exclusion chromatography and the molecular masses were determined by multiangle light scattering (SEC-MALS). The protein eluted as a single peak with a molecular mass consistent with a dimer in solution.
